# Supplementary material for: Genomic analyses with biofilter 2.0: knowledge driven filtering, annotation, and model development
Source: Springer Nature journal article supplement (doi:10.1186/1756-0381-6-25), 2013-12-01
Supplement: 13040_2013_133_MOESM2_ESM.pdf [file 13040_2013_133_MOESM2_ESM.pdf]

|                 |                                                                                    |                                                                                                                                                                                                                                                                                                                 |
|-----------------|------------------------------------------------------------------------------------|-----------------------------------------------------------------------------------------------------------------------------------------------------------------------------------------------------------------------------------------------------------------------------------------------------------------|
| <b>SNP</b>      |    | Identifier: RS number, example “rs1234”.<br>Used to refer to a known and documented SNP whose position can be retrieved from the knowledge database.                                                                                                                                                            |
| <b>Position</b> |   | Identifier: Chromosome and basepair location, example “chr1:234”.<br>Used to refer to any single genomic location, such as a single nucleotide polymorphism (SNP), single nucleotide variation (SNV), rare variant, or any other position of interest.                                                          |
| <b>Region</b>   |   | Identifier: Chromosome and basepair range, example “chr1:234-567”.<br>Used to refer to any genomic region, such as a copy number variation (CNV), insertion/deletion (indel), gene coding region, evolutionarily conserved region (ECR), functional region, regulatory region, or any other region of interest. |
| <b>Gene</b>     |   | Identifier: Name, example “A1BG” or “ENSG00000121410”.<br>Used to refer to a known and documented gene, whose genomic region and associations with any pathways, interactions or other groups can be retrieved from the knowledge database.                                                                     |
| <b>Group</b>    |   | Identifier: Name, example i.e. “lipid metabolic process” or “GO:0006629”.<br>Used to refer to a known and documented pathway, ontological group, protein interaction, protein family, or any other grouping of genes, proteins or genomic regions that was provided by one of the external data sources.        |
| <b>Source</b>   |  | Identifier: Name, example “GO”.<br>Used to refer to a specific external data source.                                                                                                                                                                                                                            |
