# Supplementary material for: Genomic analyses with biofilter 2.0: knowledge driven filtering, annotation, and model development
Source: Springer Nature journal article supplement (doi:10.1186/1756-0381-6-25), 2013-12-01
Supplement: 13040_2013_133_MOESM3_ESM.pdf [file 13040_2013_133_MOESM3_ESM.pdf]

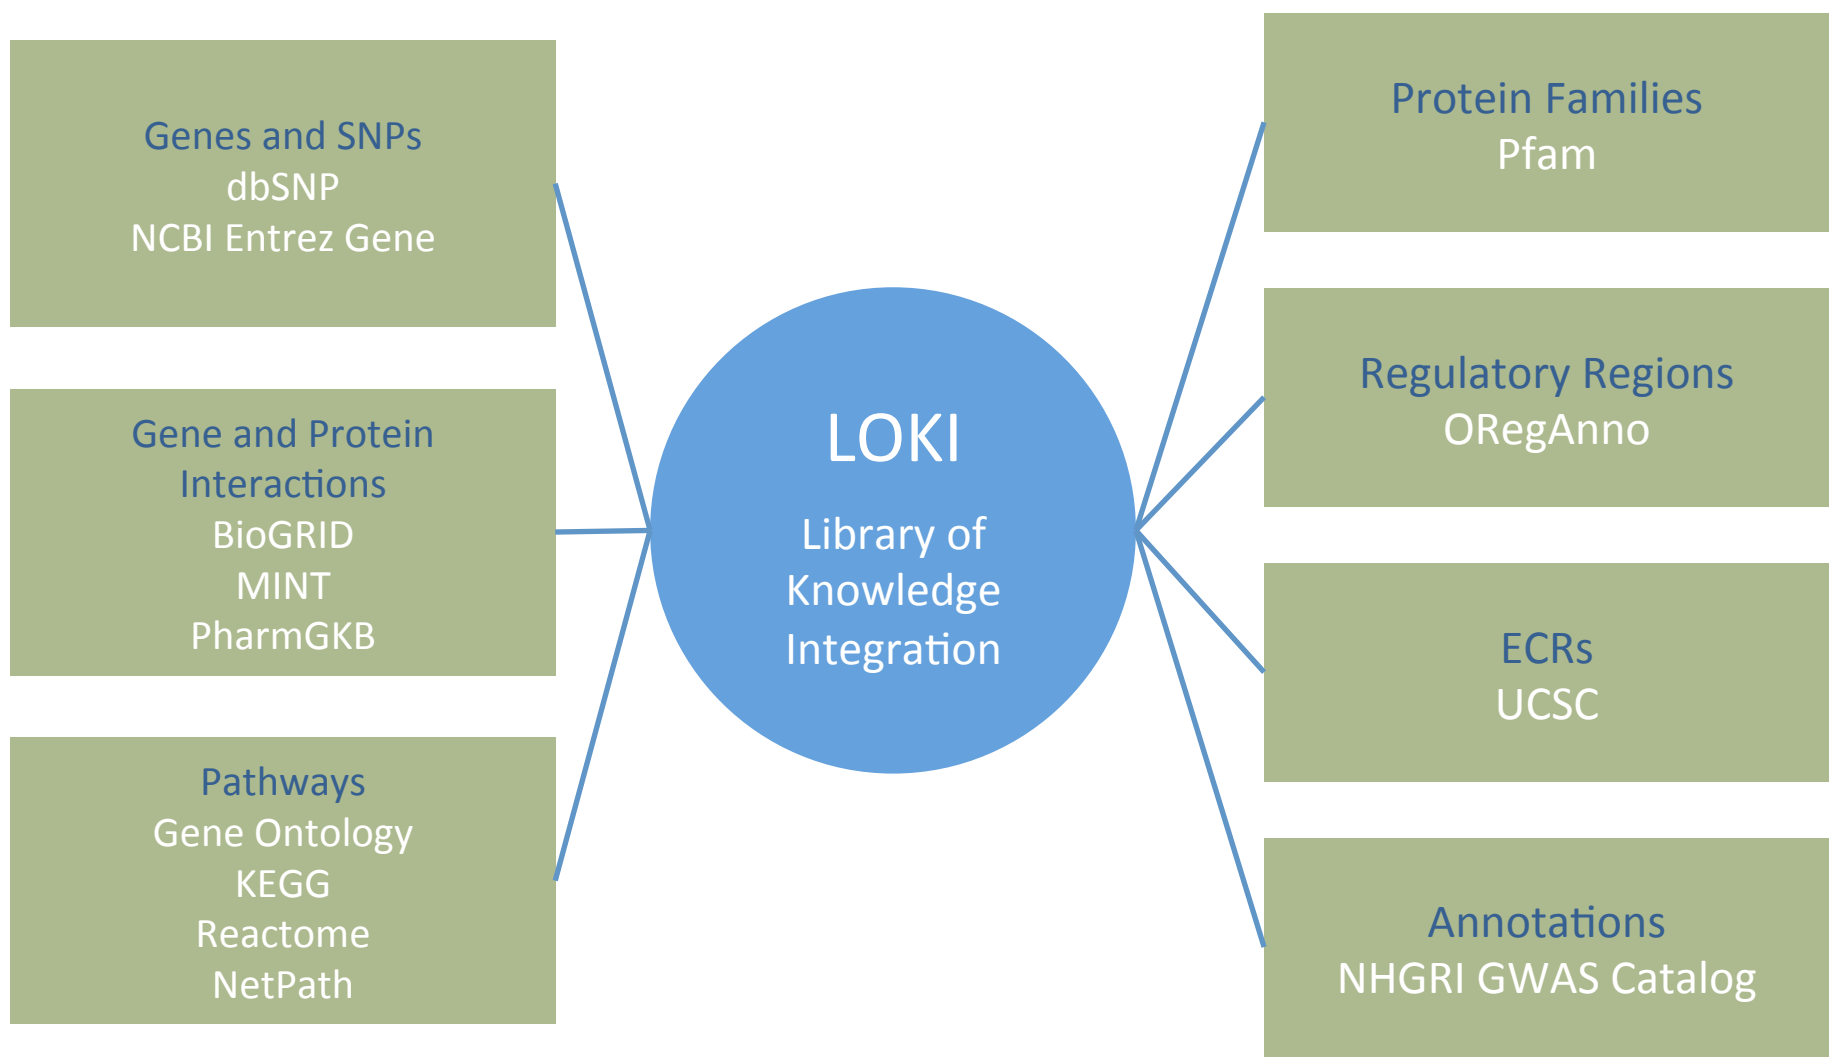

**Genes and SNPs**  
dbSNP  
NCBI Entrez Gene

**Gene and Protein Interactions**  
BioGRID  
MINT  
PharmGKB

**Pathways**  
Gene Ontology  
KEGG  
Reactome  
NetPath

**LOKI**  
Library of Knowledge Integration

**Protein Families**  
Pfam

**Regulatory Regions**  
ORegAnno

**ECRs**  
UCSC

**Annotations**  
NHGRI GWAS Catalog
