# Supplementary material for: Genomic analyses with biofilter 2.0: knowledge driven filtering, annotation, and model development
Source: Springer Nature journal article supplement (doi:10.1186/1756-0381-6-25), 2013-12-01

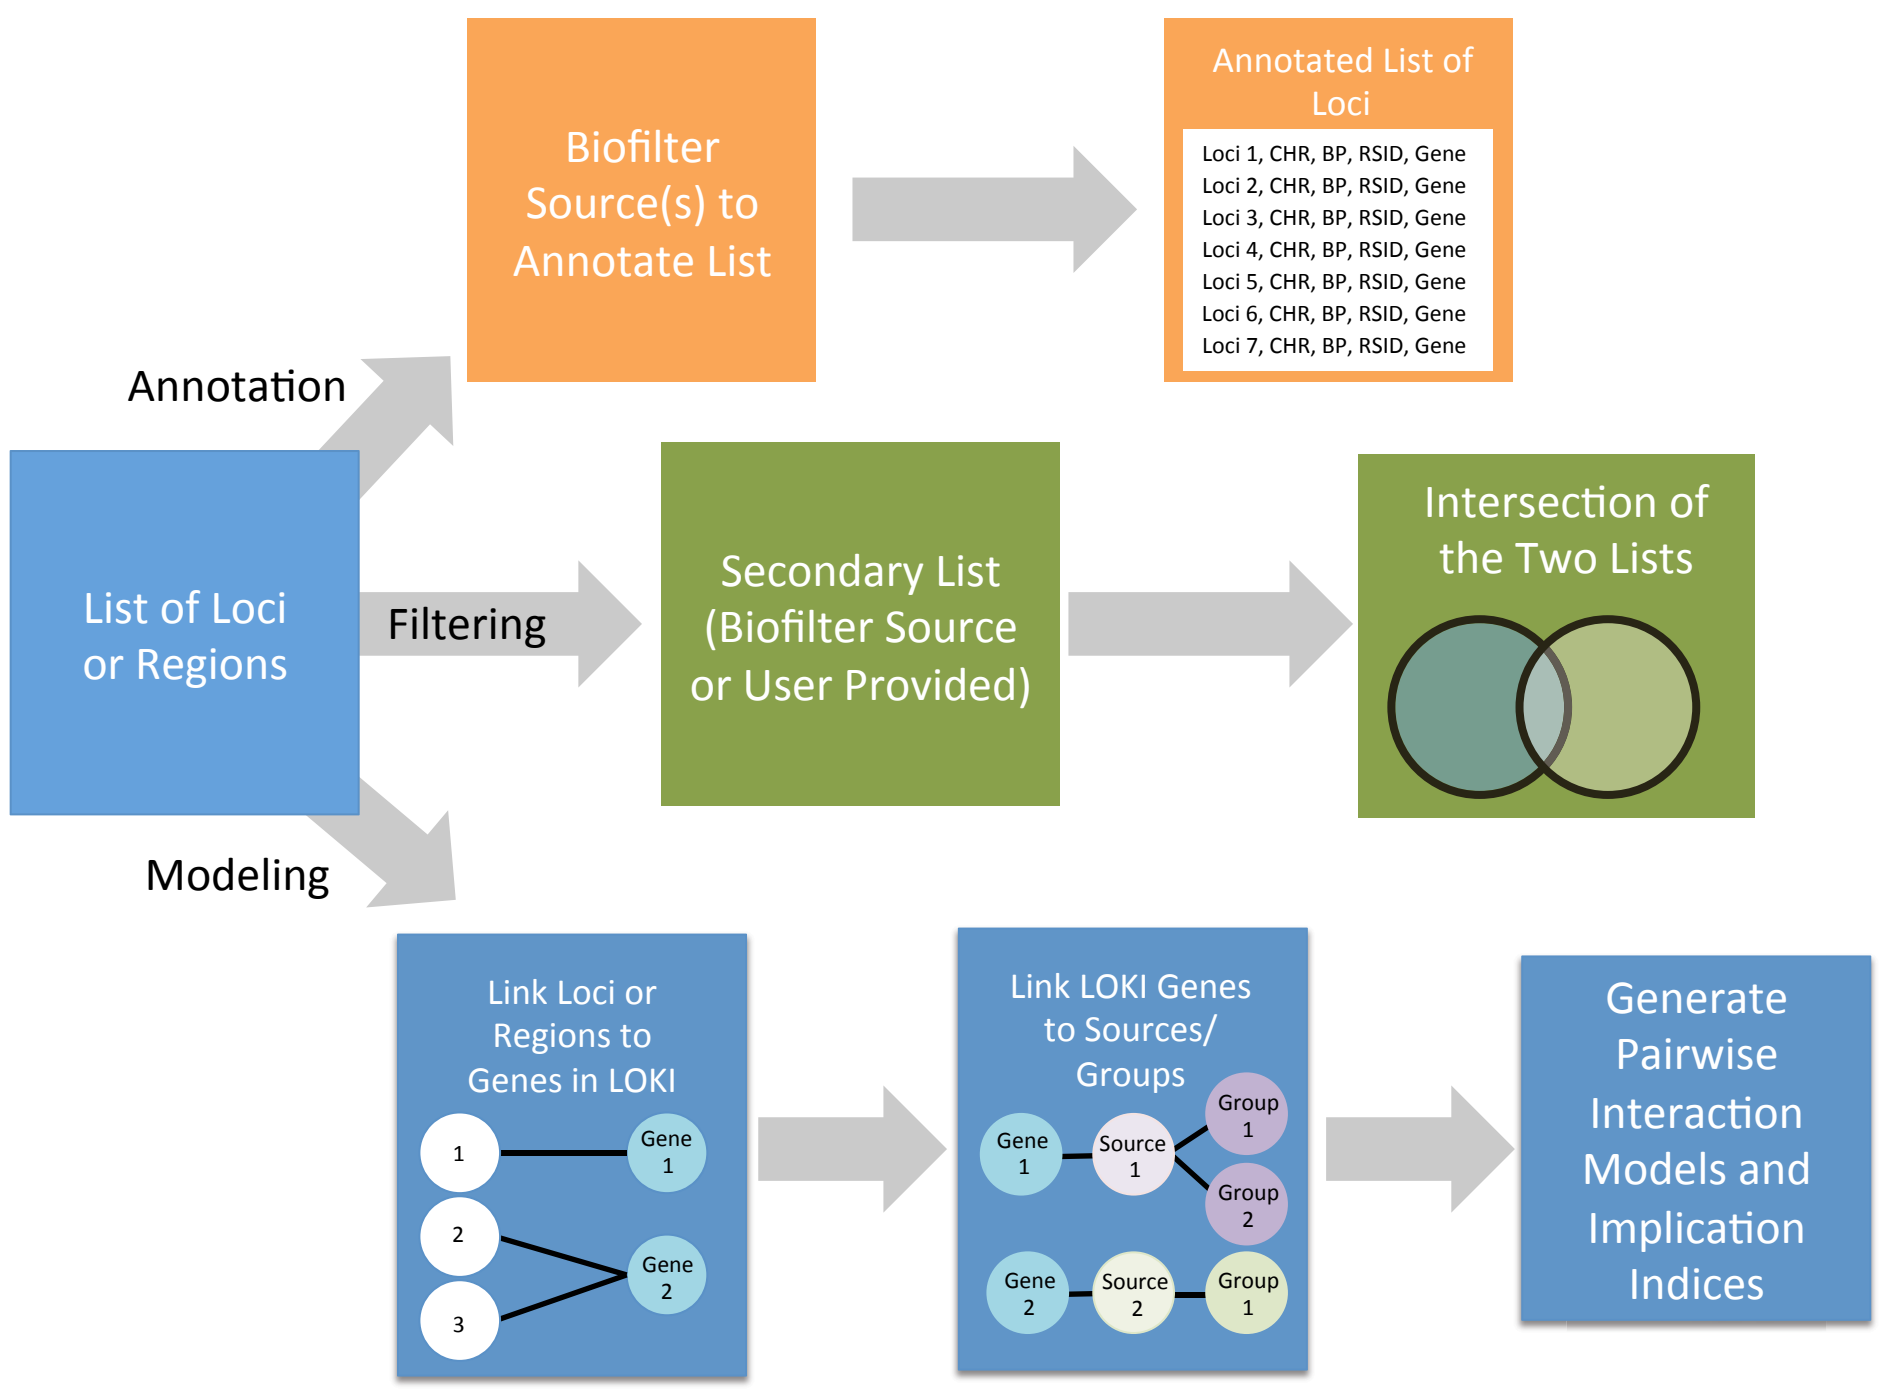



Supplement: 13040_2013_133_MOESM5_ESM.pdf [file 13040_2013_133_MOESM5_ESM.pdf]
