# Supplementary material for: Genomic analyses with biofilter 2.0: knowledge driven filtering, annotation, and model development
Source: Springer Nature journal article supplement (doi:10.1186/1756-0381-6-25), 2013-12-01
Supplement: 13040_2013_133_MOESM7_ESM.pdf [file 13040_2013_133_MOESM7_ESM.pdf]

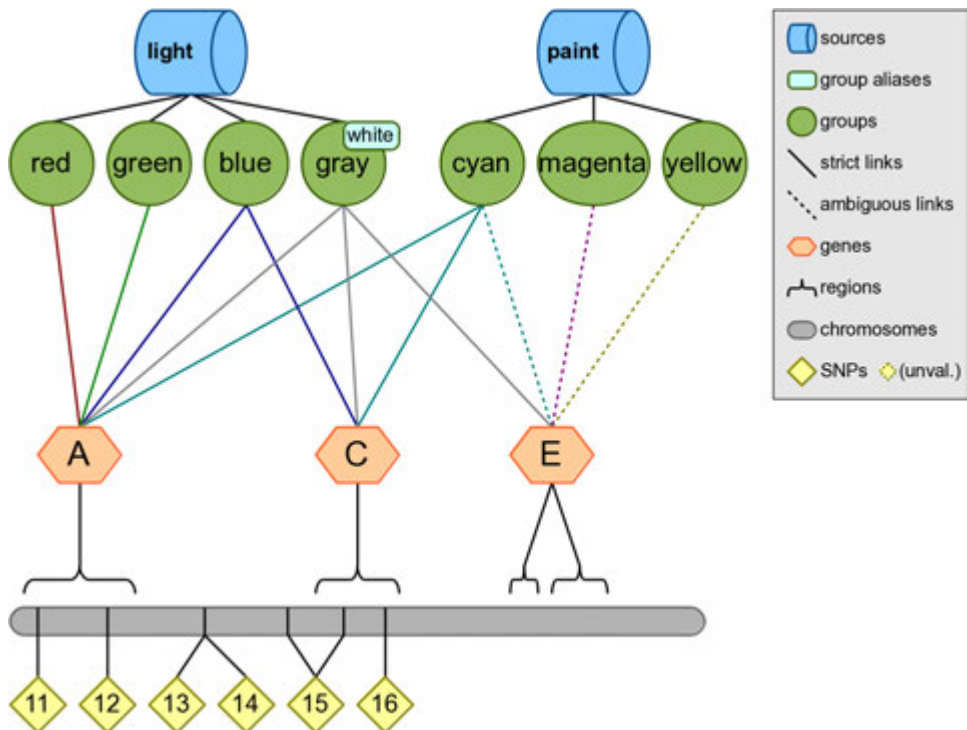

| Input 1: SNPs | Input 2: Genes | Output: SNPs |
|---------------|----------------|--------------|
| rs11          | A              | rs11         |
| rs12          | C              | rs12         |
| rs13          | E              | rs15         |
| rs13          |                | rs16         |
| rs14          |                |              |
| rs15          |                |              |
| rs16          |                |              |
