# Supplementary material for: Genomic analyses with biofilter 2.0: knowledge driven filtering, annotation, and model development
Source: Springer Nature journal article supplement (doi:10.1186/1756-0381-6-25), 2013-12-01
Supplement: 13040_2013_133_MOESM9_ESM.pdf [file 13040_2013_133_MOESM9_ESM.pdf]

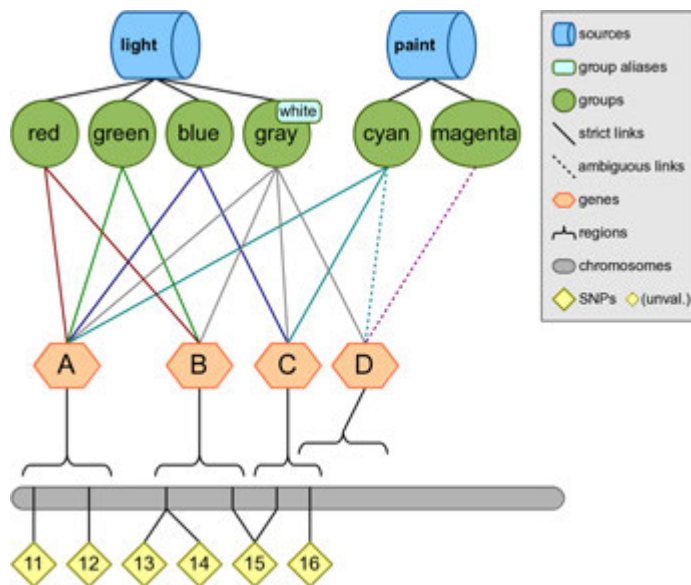

| Input 1: SNPs | Output: Chromosomes | Output: Gene Identifiers | Ouput: Start bp of region | Output: End bp of region |
|---------------|---------------------|--------------------------|---------------------------|--------------------------|
| rs11          | 1                   | A                        | 8                         | 22                       |
| rs12          | 1                   | B                        | 28                        | 52                       |
| rs13          | 1                   | C                        | 54                        | 62                       |
| rs14          | 1                   | D                        | 58                        | 72                       |
| rs15          |                     |                          |                           |                          |
